# Supplementary material for: The Ectodomain of Glycoprotein from the Candid#1 Vaccine Strain of Junin Virus Rendered Machupo Virus Partially Attenuated in Mice Lacking IFN-αβ/γ Receptor
Source: PubMed Central journal article supplement (PMC5006991; doi:10.1371/journal.pntd.0004969), 2016-08-31
Supplement: pntd.0004969.s004.pdf [file pntd.0004969.s004.pdf]

DDBJ/EMBL/GenBank (accession number: LC123592)

>MCg1\_S/LC123592.seq

CGCACCGGGGATCCTAGGCGATTCTTGATCGCGCTTATTAGCTAACCAATTTAATTTGGT  
GTTGAAGTGTGACACGCTCTAACACATGGGGCAGCTTATCAGCTTCTTCAGGAGAT  
TCCTGTTTTTCTACAGGAAGCTCTGAACATCGCTTTAGTGGCTGTTAGTCTCATAGCTGT  
CATCAAAGGCATCATTAACTTTACAAAAGTGGTCTCTCCAGTTCATCTTCTTTCTCT  
CCTAGCAGGGAGGTCCTGCTCGGAAGAAGCTTTCAAAAATCGGACTGCACACTGAGTTCCA  
GACTGTGCTCTTCTCAATGGTGGGTCTCTTTTCCAACAATCCACATGACCTACCTTTGTT  
GTGTACCTTAAACAAGAGCCATCTTTACATTAAGGGGGGCAATGCTTCATTTTCAGATCAG  
CTTTGATGATATTGCAGTATTGTTGCCACAGTATGATGTTATAATAACAACATCCAGCAGA  
TATGAGCTGGTGTTCAAAAGTGATGATCAAATTTGGTGTCTCAGTGGTTCATGAATGC  
TGTGGGACATGATTGGCATCTAGACCCACCATTTCTGTGTAGGAACCGTGCAAAGACAGA  
AGGCTTCATCTTTCAAGTCAACACCTCCAAGACTGGTGTCAATGGAATTTATGCTAAGAA  
GTTTAAAGACTGGCATCATTATATAGAGAATATCCTGACCTTGCTTGAATGGCAA  
ACTGTGCTTAATGAAGGCACAACCTACCAGTTGGCCTCTCCAATGTCCACTCGACCAGT  
TAACACATTACACTTCCTTACAAGAGGTAAAAACATTCAACTTCCAAGGAGGTCCTTGAA  
AGCATTCTTCTCCTGGTCTTTGACAGACTCATCCGGCAAGGATACCCCTGGAGGCTATTG  
TCTAGAAGAGTGGATGCTCGTAGCAGCCAAAATGAAGTGTTTTGGCAATACTGCTGTAGC  
AAAATGCAATTTGAATCATGACTCTGAATTTCTGTGACATGTTGAGGCTCTTTGATTACAA  
CAAAAATGCTATCAAAACCCTAAATGATGAAACTAAGAAACAAGTAAATCTGATGGGGCA  
GACAATCAATGCCCTGATATCTGACAATTTATTGATGAAAAACAAAATTAGGGAAGTGT  
GAGTGTCCCTTACTGCAATTACACAAAATTTTGGTATGTCAACCACACACTTTCAGGACA  
ACACTCATTACCAAGTGTCTGGTTAATAAAAAACAACAGCTATTTGAACATCTCTGACTT  
CCGTAATGACTGGATATTAGAAAAGTGACTTCTTAATTTCTGAAATGCTAAGCAAAGAGTA  
TTCGGACAGGCAGGGTAAAACCTCTTTGACTTTAGTTGACATTTGTTTCTGGAGCACAAT  
TTTCTTACAGCATCATTGTTTCCTCATCTAGTTGGA-ATACCCACCCATCGACACCTCA  
AAGGCGAAGCCTGTCTTTGCTCATAAGCTGGACAGCTTCGGAGGTTGTAGATGTGGCA  
AATATCCCAGATTGAAGAAACCCACCATCTGGCACA AAAAGACATTAACACAGCCAAGAC  
CCCTGCCGACCCGGGCCAGCCCGGGTCCGGGGCCCCCAGTCCGCGGCTCTGCCGCG  
GACTCATTACCAAGTGTCTTACAGTGCAAAGGCTGCCCTGGGTAGAAATAGAAGGCTGAGA  
GGTAAAAGTGCCACTGGTCTTTCATCTACCATTTTGCCATCCATCACTGATTGATACATG  
ATACAATCCAACAGAGCACAGTGAGGTTACCAGAACTCAATTTGAATGGAGAGTCTTTT  
TCTCTCTTTTCTGTGACAACAACCTCATTATGATGTTTGCAAAGATGTCCAACTTC  
TCCCAAATTTGCTGATCATAGAGTCTTGCTTGATCAGATGTGAGTTTACATCTACCAGC  
TTTAAATCCTTCCGTCCATGAATGTCTAAAAGTTTCTTATGTGCTCAGAACCTTGAGTT  
GTAATCACCATCTTGTGGTAGTAAACCTATTACATAACTTAATACTCCTGGCATTGCA  
TCCTCGATCTTGCATCAAGATGCCATGTGAATGTCTGCTGCCATTTTGAAGCCCTTC  
TCATCATGTGGCTTTCTAAAACAATGAATATAATGCTTGTGGTGGCTGGCTGATATAGTGCC  
AATTCCACAGGGTCTGTTGGAGGCCCTTCAATGTCAAGCCACAGTGTATTAGTGGGGTCT  
AACTTCTTTACAGCCTCTTTAATCACTGCTTCTTGCATTTTCAGTCAGGTTTGTAGTCTT  
AGATTCTGACCGTTTTTCTCGGGTTGTCTCGGTCCAACCTTGAGGTTTCTTTGTTAGATCA  
ACACTTGTGTTGTCCCAAGATCTCCCAAGAATTTGTGATCTGGAACCAATGTAAGGCCAC  
CCGTACCTGAGAGACACAATTTATACAGAAGGTTCTCATAAGGATTTTCGATTCCAGGT  
TTCTCGTCTATAAACATCCCCCTTTTTCGCTTGACTTGCAGAGTTGATTTAATCAAGCTG  
GAGAAATTATCAGGAGTGACCCTAATTGTTTCCAGCATGTTCCACCGTCAAGTATTGAG  
GCGCCAGCTTTCACAGCAGCTGACAGACTGAAGTTATAGCCAGAGATGTTGATGGAGCTC  
TCGTCTTAGTTACGATCTGCAAGCATTCGTGCTCTAGAGTTAGCTTGTCAAGGTCATTT  
AAATTCGGATATTTAACAGTGTATAACAGGCCAGAGATGTCAACGCTTGACCACACTA  
TTCATCGTTTCTCCACCCTGGACAGTCATACAAGCGATTGTGAGAGCTGGCATGGAACCA  
AACTGATTATTCAGTTTTGATGGATCTGAGACATCCAGATTCTAACCACACCATTTCCA  
GCACCTCTCTGCTGTTGGAATCCCAGGGTCTTCAAGATTTCTGACCTCTTTGTCAAGTTGC  
AGTGTGACAAATACCCTATGACAGCCCTGGGGACCTGACTCAGTCCCTTTTATCTTG  
TTCTTCAAGTTTTTCCAAGTCTGATGCAAGCTCCATCAATTCATCTCTCCCCAGATCTCCA  
ATCTTGAATATGGTGTTTTTCTGGATGCTTTTCATAGACATGAGCCTATCCACTTCTTTG  
TTTAAATCCCTCAGCTTGTTCAGATCCTCTTACCCCTTTTGTCTTTCTGAGAGCCCTC  
TGCATTGTGAAACCTGGTTGAAGTCGATGCTGTCAGCTATGAGCTTGGCATCTTTCAAC  
ACATCTGTTTTACAGTGTGGGTGAACTGACTCAGGCCTTCTCAGTGAAGTCCAC  
CGAAAGCTGGGAATTTCTTGGAGTGAGCCATAGTGGCTAATAACCAAAGGATTTGAAAT

AAAGCTCAGTAGAAGAGTTAGACACTTTGCTAGGATCCACTGTGCGC

DDBJ/EMBL/GenBank (accession number: LC123593)

>MCg2\_S/LC123593.seq

CGCACCGGGGATCCTAGGCGATTCTTGATCGCGCTTATTAGCTAACCAATTTAATTTGGT  
GTTGAAGTGTGACACGCTCTTAACACATGGGGCAGCTTATCAGCTTCTTTCAGGAGAT  
TCCTGTTTTCTACAGGAAGCTCTGAACATCGCTTTAGTGGCTGTTAGTCTCATAGCTGT  
CATCAAAGGCATCATTAAACCTTTACAAAAGTGGTCTCTTCCAGTTCATCTTCTTCTCCT  
CCTAGCAGGGAGGTCCTGCTCGGAAGAAGCTTTCAAAAATCGGACTGCACACTGAGTTCCA  
GACTGTGTCCTTCTCAATGGTGGGTCTCTTTTCCAACAATCCACATGACCTACCTTTGTT  
GTGTACCTTAAACAAGAGCCATCTTTACATTAAGGGGGGCAATGCTTCATTTTCAGATCAG  
CTTTGATGATATTGCAGTATTGTTGCCACAGTATGATGTTATAATAACAACATCCAGCAGA  
TATGAGCTGGTGTTCAAAAGTGTATGATCAAATTTGGTGTCTCAGTGGTTCATGAATGC  
TGTGGGCATGATTGGCATCTAGACCCACCATTCTGTGTAGGAACCGTGCAAAGACAGA  
AGGCTTCATCTTTCAAGTCAACACCTCCAAGACTGGTGTCAATGGAAATTATGCTAAGAA  
GTTTAAAGACTGGCATGCATCATTATATAGAGAATATCCTGACCCTTGCTTGAATGGCAA  
ACTGTGCTTAATGAAGGCACAACCTACCAGTTGGCCTCTCCAATGTCCACTCGACCACGT  
TAACACATTACACTTCCTTACAAGAGGTAAAAACATTCAACTTCCAAGGAGGTCTTTGAA  
AGCATTCTTCTCCTGGTCTTTGACAGACTCATCCGGCAAGGATACCCCTGGAGGCTATTG  
TCTAGAAGAGTGGATGCTCGTAGCAGCCAAAATGAAGTGTTTTGGCAATACTGCTGTAGC  
AAAATGCAATTTGAATCATGACTCTGAATTTCTGTGACATGTTGAGGCTCTTTGATTACAA  
CAAAAATGCTATCAAAACCCTAAATGATGAAACTAAGAAACAAGTAAATCTGATGGGGCA  
GACAATCAATGCCCTGATATCTGACAATTTATTGATGAAAAACAAAATTAGGGAACGTGAT  
GAGTGTCCCTTACTGCAATTACACAAAATTTTGGTATGTCAACCACACACTTTCAGGACA  
ACACTCATTACCAAGGTGCTGGTTAATAAAAAACAACAGCTATTTGAACATCTCTGACTT  
CCGTAATGACTGGATATTAGAAAGTGACTTCTTAATTTCTGAAATGCTAAGCAAAGAGTA  
TTCGGACAGGCAGGGTAAAACCTCTTTGACTTTAGTTGACATTTGTATCTGGAGCACAAAT  
TTTCTTACAGCATCATTGTTTCCTCATCTAGTTGGA-ATACCCACCCATCGACACCTCA  
AAGGCGAAGCCTGTCTTTGCTCATAAGCTGGACAGCTTCGGAGGTTGTAGATGTGGCA  
AATATCCAGTTGAGAAACCCACCATTCTGGCACAAAAGACATTAACACAGCCAAGAC  
CCCTGCCGACCCGGGCCAGCCCGGGTCGGCGGGGCCCCCAGTCCGCGGCTCTGCCGCG  
GACTGGGGAGGCAGTCTTACAGTGCAAAGGCTGCCTTGGGTAGAAATAGAAGGCTGAGA  
GGTAAAAGTGCCACTGGTCTTTCATCTACCATTTTGCCATCCATCACTGATTGATACATG  
ATACAATCCAACAGAGCACAGTGAGGTTACCAGAACTCAATTTGAATGGAGAGTCTTTT  
TCTCTTTTTCTTGTGACAACAACCTCCATTATGATGTTTGCAAAGATGTCCAAACTTC  
TCCCAAAATTTGCTGATCATAGAGTCTTGCTTGATCAGATGTGAGTTTCACATCTACCAGC  
TTTAAATCCTTCGTCATGAATGTCTAAAAGTTTCCTTATGTCGTCAGAACCTTGAGTT  
GTAATCACCATATCTTGTGGTAGTAAACCTATTACATAACTTAATACTCCTGGCATTGCA  
TCCTCGATGTCTTGATCAAGATGCCATGTGAATGTCTGCTGCCATTTTTGAAGCCCTTC  
TCATCATGTGGCTTTCTAAAACAATGAATATAATGCTTGTGGCTGGCTGATATAGTGCC  
AATTCCACAGGCTCTGTTGGAGGCCCTCAATGTCAAGCCACAGTGTATTAGTGGGGTCT  
AACTTCTTTACAGCCTCTTTAATCACTGCTTCTTGCAATTCAGTCAGGTTTGCTAGTCTT  
AGATTCTGACCGTTTTTCTCGGGTTGTCTCGGTCCAACCTTGAGGTTTCTTTGTTAGATCA  
ACACTTGTGTTGTCCCAAGATCTCCCAAGAATTTGTGATCTGGAACCAATGTAAGGCCAC  
CCGTACCTGAGAGACACAATTTATACAGAAGGTTCTCATAAAGGATTTTCGATTCCCAGGT  
TTCTCGTCTATAAACATCCCCTCTTTTCGCTTGACTTGCAGAGTTGATTTAATCAAGCTG  
GAGAAATTATCAGGAGTGACCCTAATTGTTTCCAGCATGTTCCACCGTCAAGTATTGAG  
GCGCCAGCTTTCACAGCAGCTGACAGACTGAAGTTATAGCCAGAGATGTTGATGGAGCTC  
TCGTCTTAGTTACGATCTGCAAGCATTCTGTGCTCTAGAGTTAGCTTGCAAGGTCATTT  
AAATTCGGATATTTAACAGTGTATAACAGGCCAGAGATGTCAACGCTTGGACCACACTA  
TTCATCGTTTCTCCACCCTGGACAGTCATACAAGCGATTGTGAGAGCTGGCATGGAACCA  
AACTGATTATTGATGTTGATGGATCTGAGACATCCAGATTCTAACCACACCATTTTCCA  
GCACCTCTCTGCTGTTGGAATCCCAGGGTCTTCAAGATTCTGACCTCTTTGTGAGTTGC  
AGCTGTGACAAATTACCCATGTACAGCCCTTGGGGACCTGACTCAGTCTCTTTATCTTG  
TTCTTCAAGTTTTTCCAAGTCTGATGCAAGCTCCATCAATTCATCTCTCCCCAGATCTCCA  
ATCTTGAATATGGTGTTTTTCTGGATGCTTTTCATAGACATGAGCCTATCCACTTCTTTG  
TTTAAATCCCTCAGCTTGTTCAGATCCTCTTACCCTTTTGTCTTCTGAGAGCCCTC  
TGCATTGTGAAACCTGGTTGAAGTCGATGCTGTCAGCTATGAGCTTGGCATCTTTCAAC

ACATCTGTTTTACAGTGTGGGTGAACTGACTCAGGCCTTCTCAGTACTGAGTCCAC  
CGAAAGCTGGGAATTTCTTGGAGTGGGCCATAGTGGCTAATAACCAAAGGATTTGAAAT  
AAAGCTCAGTAGAAGAGTTAGACACTTTGCCTAGGATCCACTGTGCGC

DDBJ/EMBL/GenBank (accession number: LC123594)

>MCg3\_S/LC123594.seq

CGCACCGGGATCCTAGGCGATTCTTGATCGCGCTTATTAGCTAACCAATTTAATTTGGT  
GTTGAAGTGTGACACGCTCTAACACATGGGGCAGCTTATCAGCTTCTTTCAGGAGAT  
TCCTGTTTTTCTACAGGAAGCTCTGAACATCGCTTTAGTGGCTGTTAGTCTCATAGCTGT  
CATCAAAGGCATCATTAACTTTACAAAAGTGGTCTCTTCCAGTTCATCTCTTTCTCCT  
CCTAGCAGGGAGGTCCTGCTCGGAAGAAGCTTTCAAAAATCGGACTGCACACTGAGTTCCA  
GACTGTGTCCTTCTCAATGGTGGGTCTCTTTTCCAACAATCCACATGACCTACCTTTGTT  
GTGTACCTTAAACAAGAGCCATCTTTACATTAAGGGGGGCAATGCTTCATTTTCAGATCAG  
CTTTGATGATATTGACAGTATTGTTGCCACAGTATGATGTTATAATACAACATCCAGCAGA  
TATGAGCTGGTGTTCAAAAGTGTGATGATCAAATTTGGTTGTCTCAGTGGTTCATGAATGC  
TGTGGGACATGATTGGCATCTAGACCCACCATTTCTGTGTAGGAACCGTGCAAAGACAGA  
AGGCTTCATCTTTCAAGTCAACACCTCCAAGACTGGTGTCAATGGAAATTATGCTAAGAA  
GTTTAAAGACTGGCATGCATCTTTATATAGAGAATATCCTGACCCTTGCTTGAATGGCAA  
ACTGTGCTTAAATGAAGGCACAACCTACCAGTTGGCCTCTCCAATGTCCACTCGACCACGT  
TAACACATTACACTTCCTTACAAGAGGTAAAAACATTTCAACTTCCAAGGAGGTCCTTGAA  
AGCATTTCTCCTGGTCTTTGACAGACTCATCCGGCAAGGATACCCCTGGAGGCTATTG  
TCTAGAAGAGTGGATGCTCGTAGCAGCCAAAATGAAGTGTTTTGGCAATACTGCTGTAGC  
AAAATGCAATTTGAATCATGACTCTGAATTCGTGACATGTTGAGGCTCTTTGATTACAA  
CAAAAATGCTATCAAAAACCCTAAATGATGAAACTAAGAAACAAGTAAATCTGATGGGGCA  
GACAATCAATGCCCTGATATCTGACAATTTATTGATGAAAAACAAAATAGGGAACTGAT  
GAGTGTCCCTTACTGCAATTACACAAAATTTGGTATGTCAACCACACACTTTCAGGACA  
ACACTCATTACCAAGGTGCTGGTTAATAAAAAACAACAGCTATTTGAACATCTCTGACTT  
CCGTAATGACTGGATATTAGAAAGTGACTTCTTAATTTCTGAAATGCTAAGCAAAGAGTA  
TTCGGACAGGCGAGGTAACACTCCTTTGACTTTAGTTGACATCTGTATTTGGAGCACAGT  
ATTCTTACAGCGTACTTTCCTTCA-CTTGGTGGGTATACCCACCCATCGACACCTCA  
AAGGCGAAGCCTGTCTTTGCCTCATAAGCTGGACAGCTTCGGAGGTTGTAGATGTGGCA  
AATATCCAGATTGAAGAAACCCACCATCTGGCACAAGACATTAACACAGCCAAGAC  
CCCTGCCGACCCGGGCCAGCCCGGGTCCGGCGGGGCCCCAGTCCGCGGCTCTGCCGCG  
GACTGGGGAGGCACTGCTTACAGTGCAAAGGCTGCCTTGGGTAGAAATAGAAGGCTGAGA  
GGTAAAAGTGCCACTGGTCTTTCATCTACCATTTGCCATCCATCACTGATTGATACATG  
ATACATCCAAACAGAGCACAGTGAAGTTTACCAGAACTCAATTTGAATGGAGAGTCTTTT  
TCTCTCTTTTCTGTGACAACAACCTTATGATGTTTGCAAAGATGTCCAACTTC  
TCCCAAATTTGCTGATCATAGAGTCTTGCTTGATCAGATGTGAGTTTACATCTACCAGC  
TTTAAATCCTTCCGTCCATGAATGTCTAAAAGTTTCTTATGTCTGTCAGAACCTTGAGTT  
GTAATCACCATATCTTGTGGTAGTAAACCTATTACATAACTTAATACTCCTGGCATTGCA  
TCCTCGATGTCTTGCATCAAGATGCCATGTGAATGTCTGTGCCATTTTGAAGCCCTTC  
TCATCATGTGGCTTTCTAAAACAATGAATATAATGCTTGTGGCTGGCTGATATAGTGCC  
AATTCCACAGGCTCTGTTGGAGGCCCTTCAATGTCAAGCCACAGTGTATTAGTGGGGTCT  
AACTTCTTACAGCCTCTTTAATCACTGCTTCTTGCATTTTCAGTCAGGTTTGCTAGTCTT  
AGATTCTGACCGTTTTTCTCGGGTGTCTCGGTCCAACCTGAGGTTTCTTTGTTAGATCA  
ACACTTGTGTTGTCCCAAGATCTCCCAAGAATTTGTGATCTGGAACCAATGTAAGGCCAC  
CCGTCACCTGAGAGACACAATTTATACAGAAGGTTCTCATAAGGATTTTCGATTCCAGGT  
TTCTCGTCTATAAACATCCCCTCTTTTCGCTTGACTTGCAGAGTTGATTTAATCAAGCTG  
GAGAAATTATCAGGAGTGACCCTAATTGTTTCCAGCATGTTCCACCGTCAAGTATTGAG  
GCGCCAGCTTTCACAGCAGCTGACAGACTGAAGTTATAGCCAGAGATGTTGATGGAGCTC  
TCGTCCTTAGTTACGACTCTGCAAGCATTCGTGCTCTAGAGTTAGCTTGCAAGGTCATTT  
AAATTCGGATTTTAAACAGTGTATAACAGGCCAGAGATGTCAACGCTTGGACCACACTA  
TTCATCGTTTTCTCCACCCTGGACAGTCATACAAGCGATTGTGAGAGCTGGCATGGAACCA  
AACTGATTATTCAGTTTTGATGGATCTGAGACATCCCAGATTCTAACCACACCATTTCCA  
GCACCTCTCTGCTGTTGGAATCCCAGGGTCTTCAAGATTTCTGACCTCTTTGTCAGTTGC  
AGCTGTGACAAATTACCCATGTACAGCCCTTGGGGACCTGACTCAGTCTCTTTATCTTG  
TTCTTCAAGTTTTTCCAAGTCTGATGCAAGCTCCATCAATTCATCTCTCCCCAGATCTCCA  
ATCTTGAATATGGTGTTTTTCTGGATGCTTTTCATAGACATGAGCCTATCCACTTCTTTG

TTTAAATCCCTCAGCTTGTTTCAGATCCTCTTCACCCCTTTTGTTCTTTCTGAGAGCCCTC  
TGCACTTGTGAAACCTGGTTGAAGTCGATGCTGTCAGCTATGAGCTTGGCATCTTTCAAC  
ACATCTGTTTTACAGTGTGGGTGAACTGACTCAGGCCTTTCTCAGTGACTGAGTCCAC  
CGAAAGCTGGGAATTCCTTGGAGTGAGCCATAGTGGCTAATAACCAAAGGATTTGAAAT  
AAAGCTCAGTAGAAGAGTTAGACACTTTGCCTAGGATCCACTGTGCGC
